# Supplementary material for: High-throughput mapping of long-range neuronal projection using in situ sequencing
Source: bioRxiv or medRxiv preprint supplement (doi:10.1101/294637), 2019-07-30
Supplement: Supplementary file [file 294637-2.pdf]

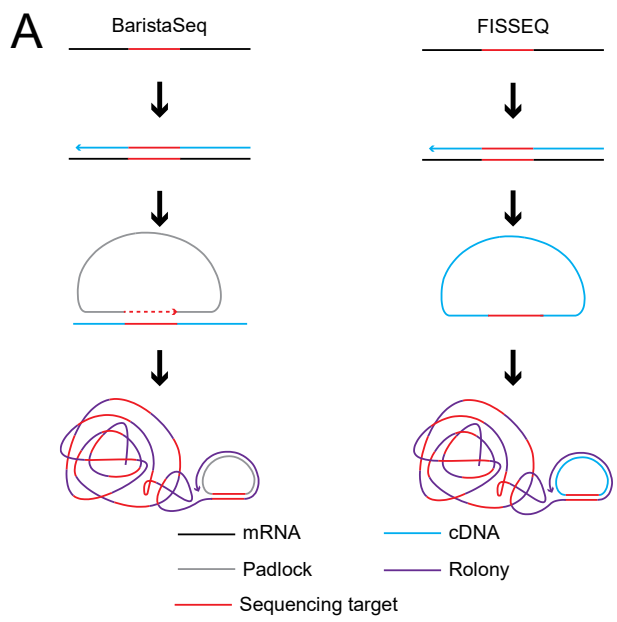

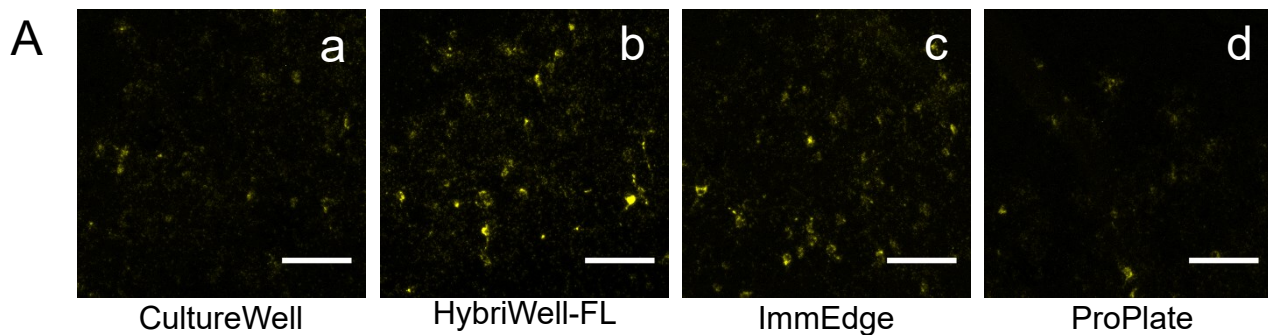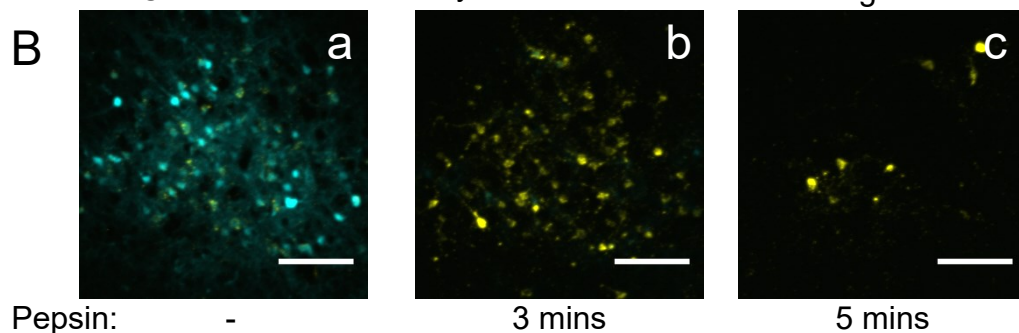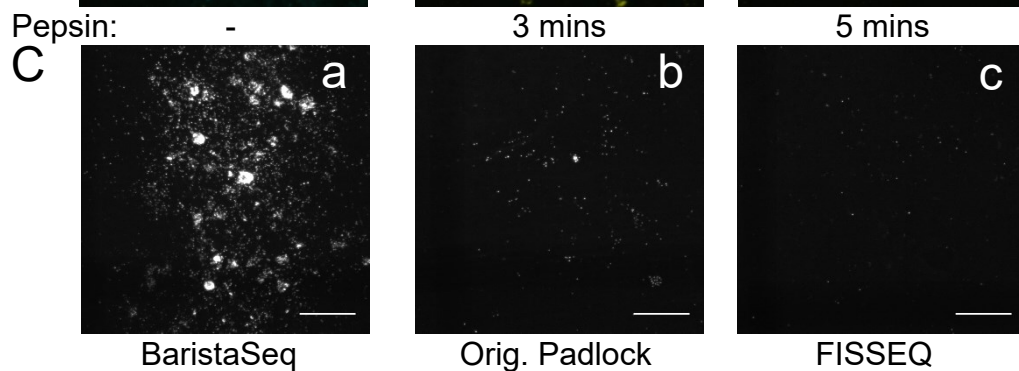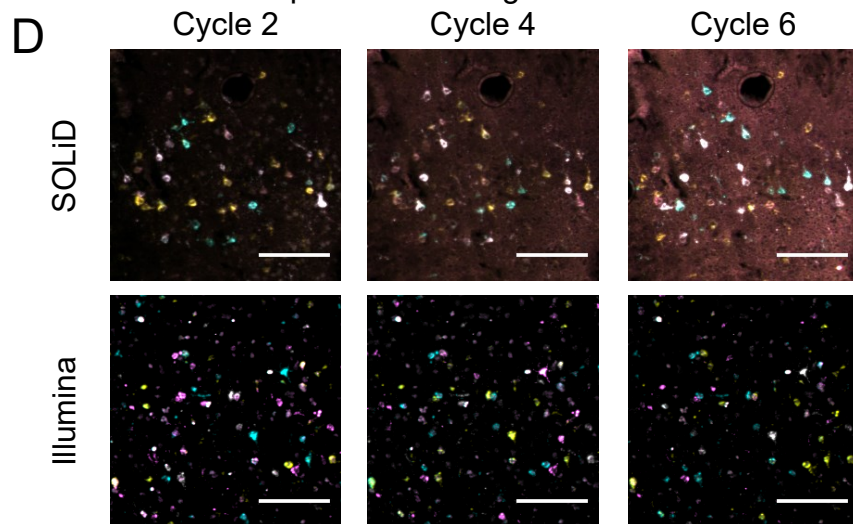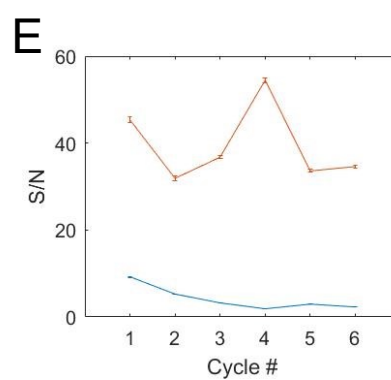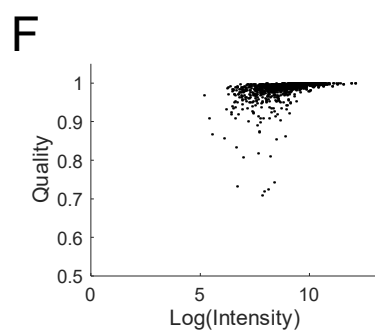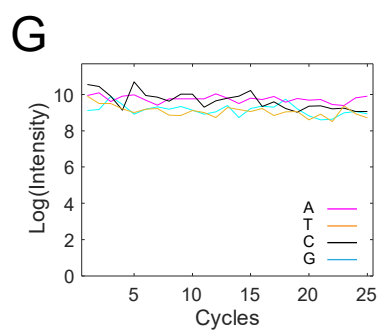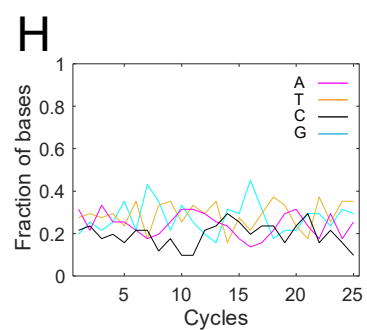

**A**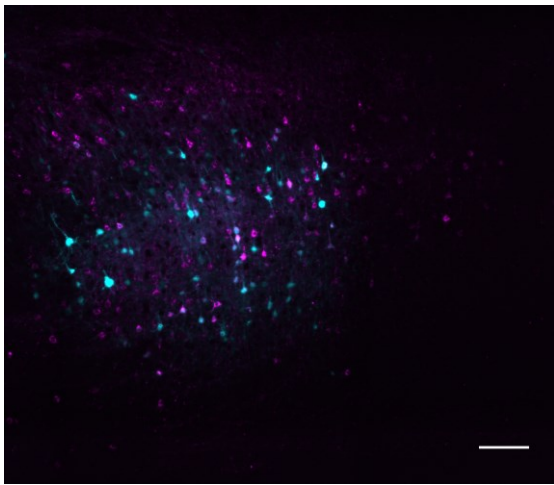**B**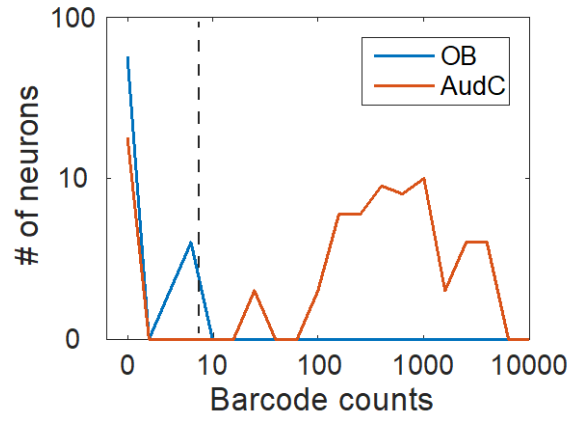

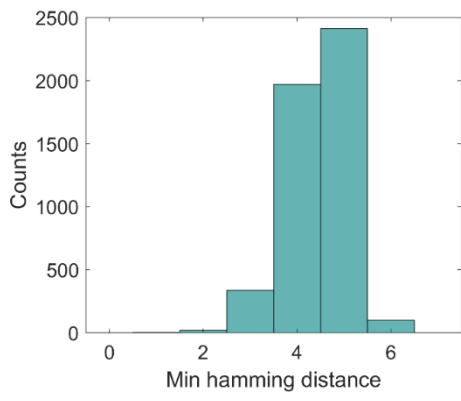

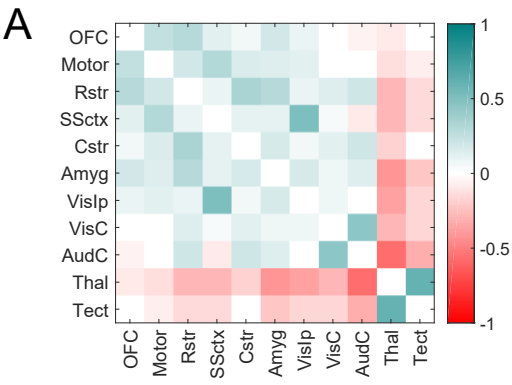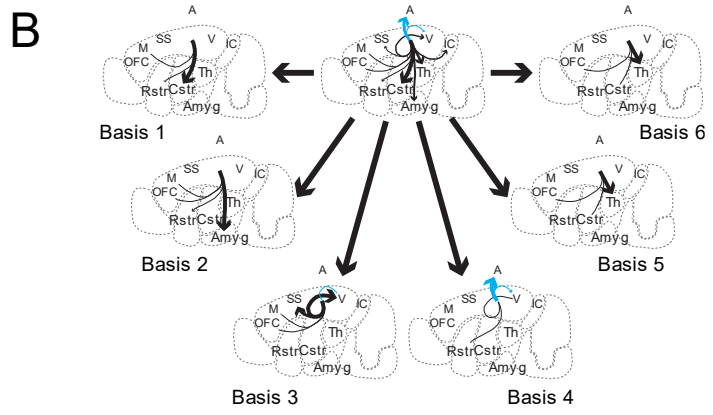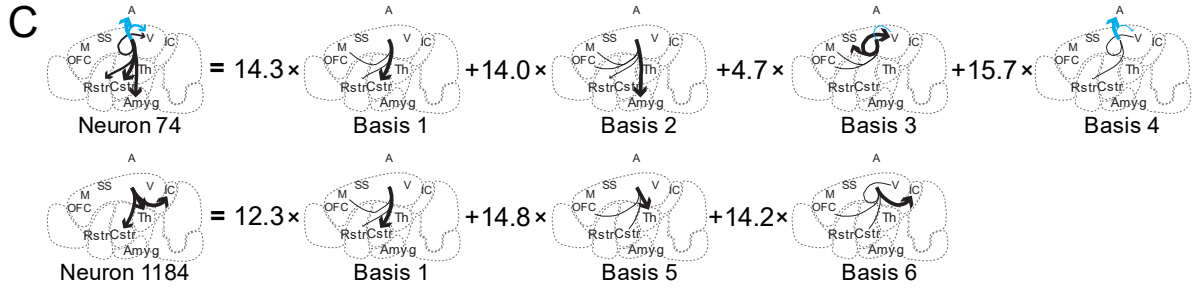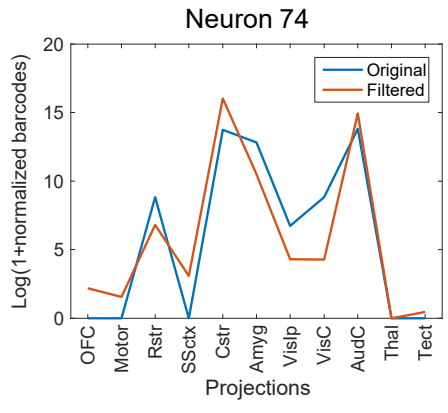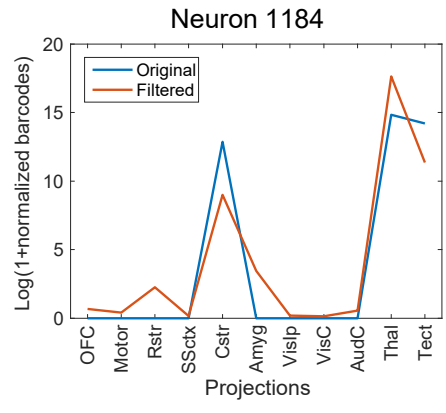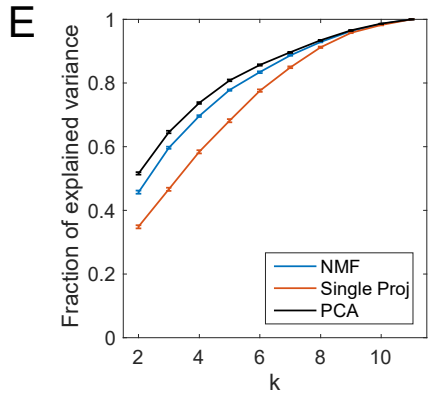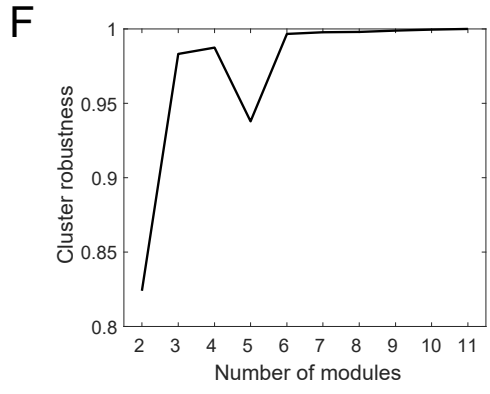

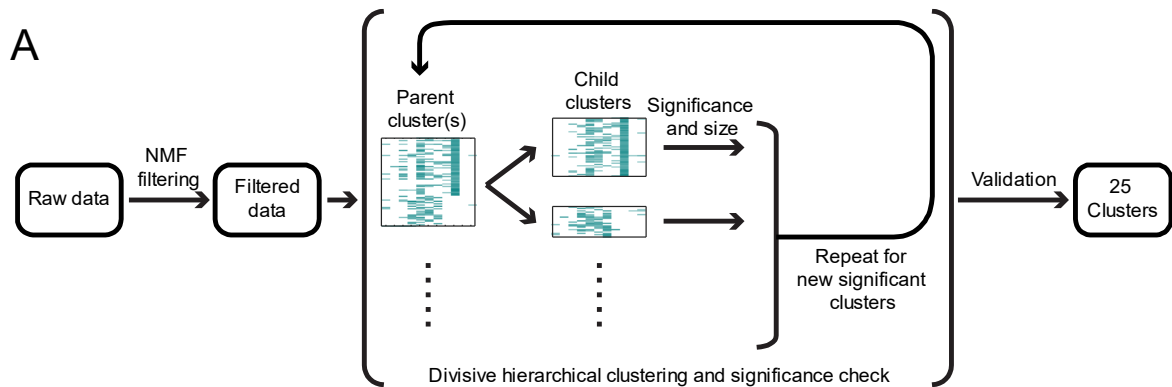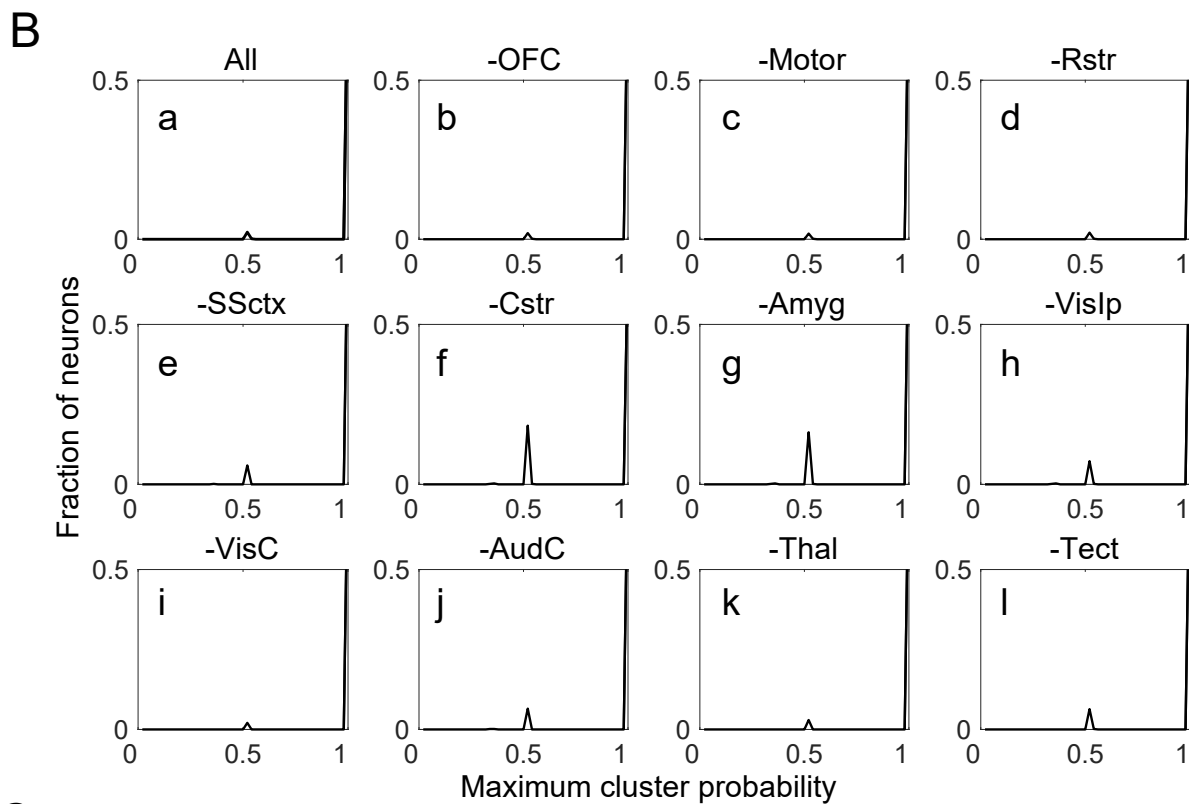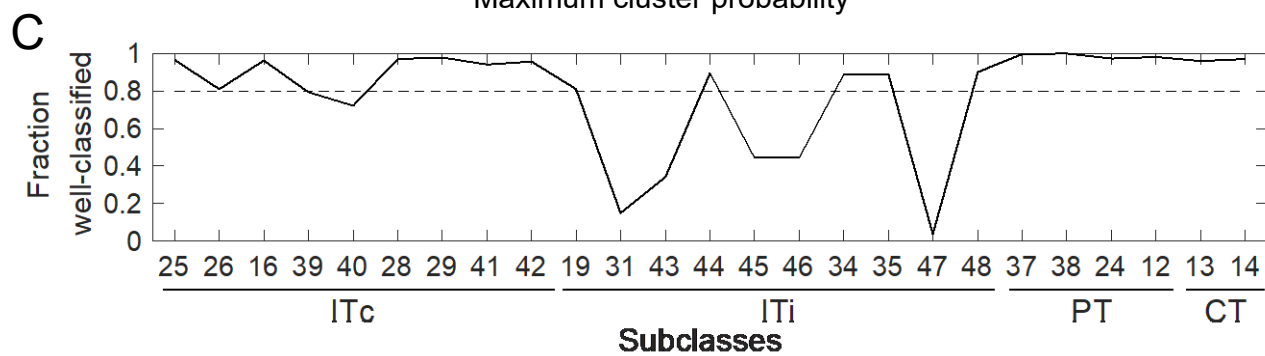

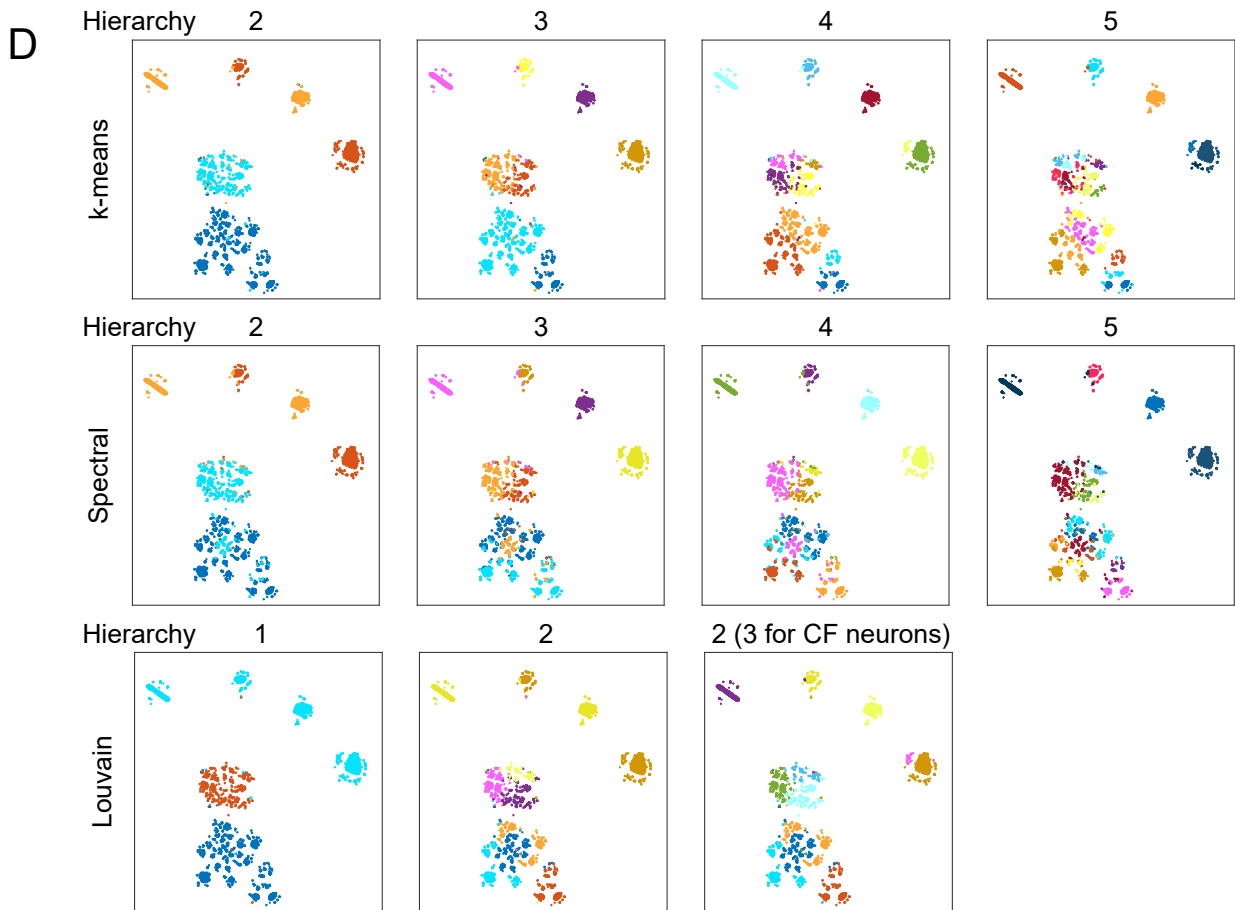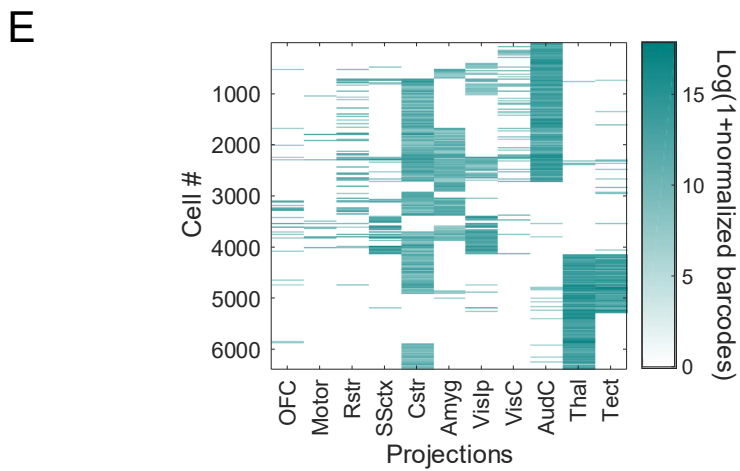

A

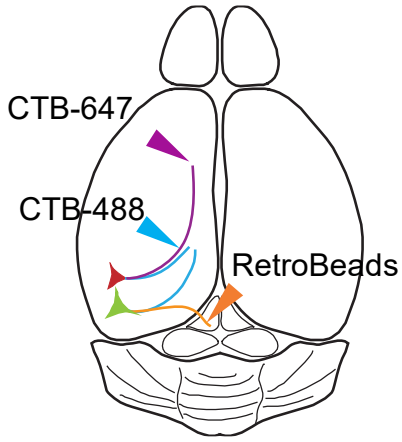

B

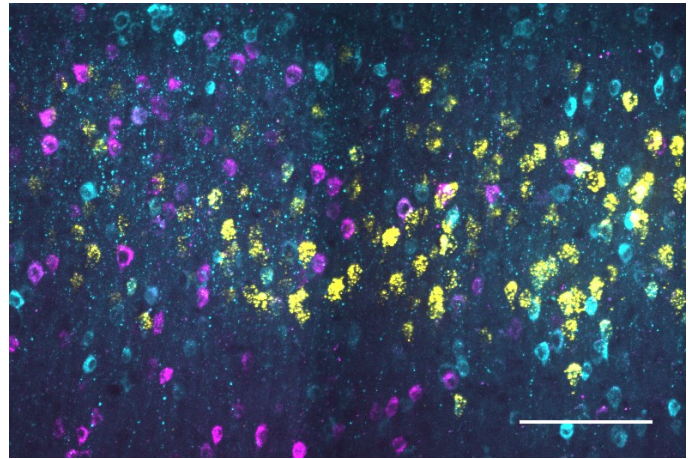

D

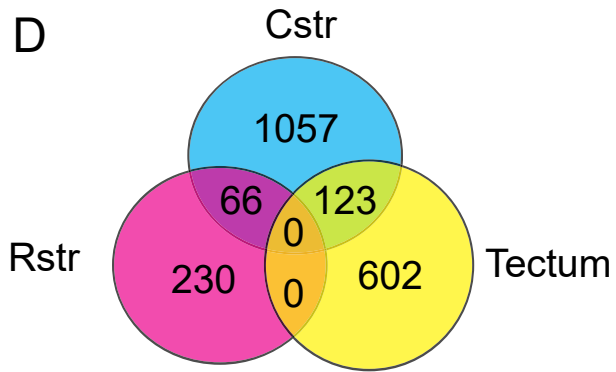



**A**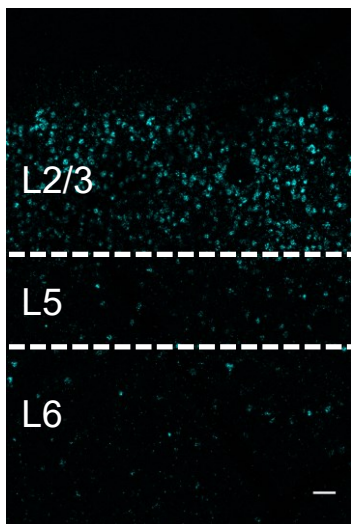**B**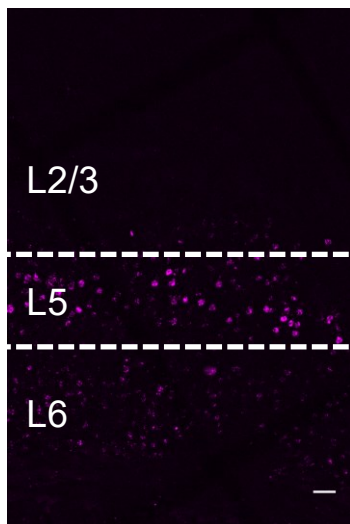**C**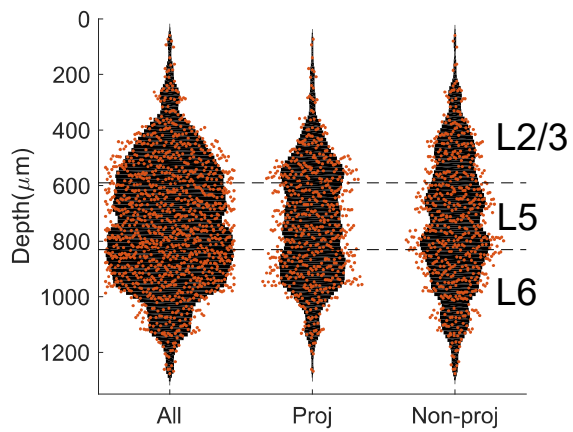

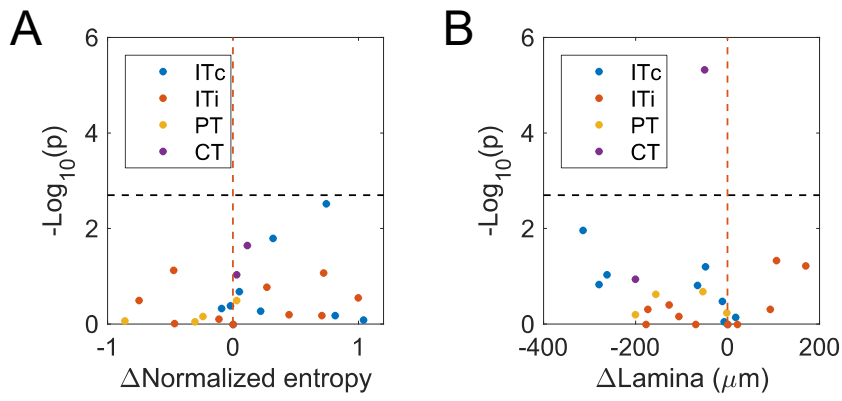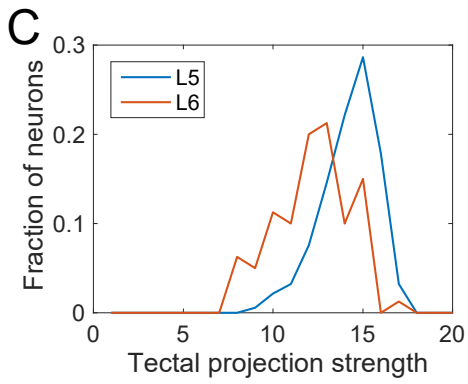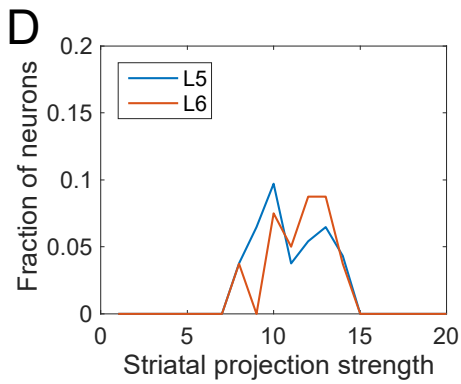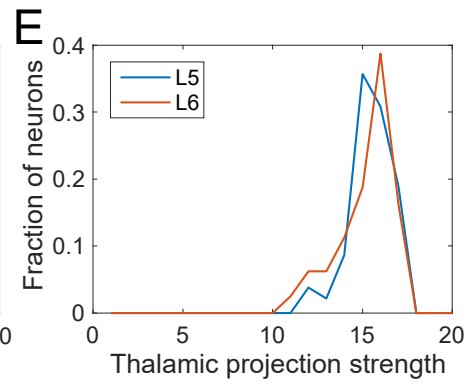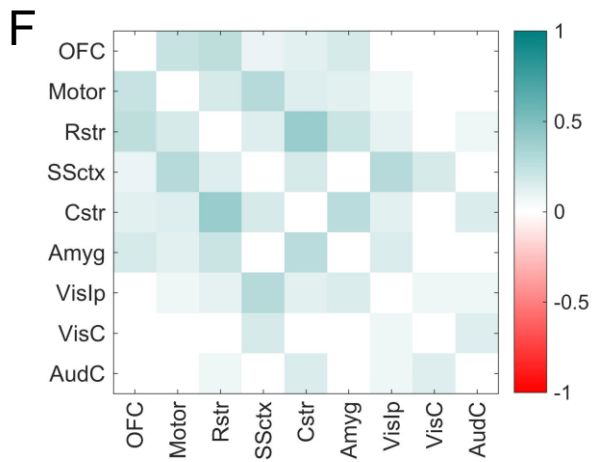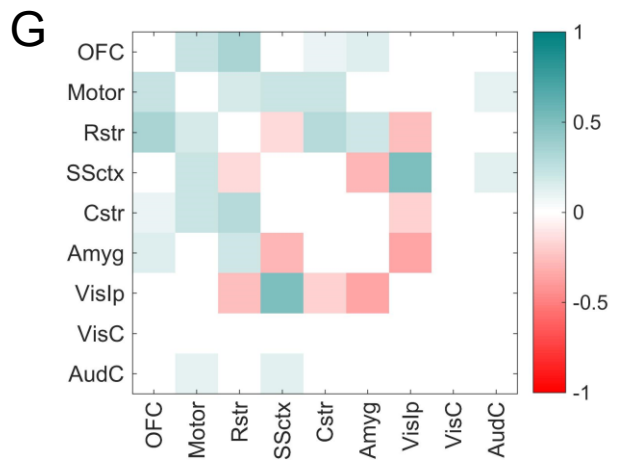

A

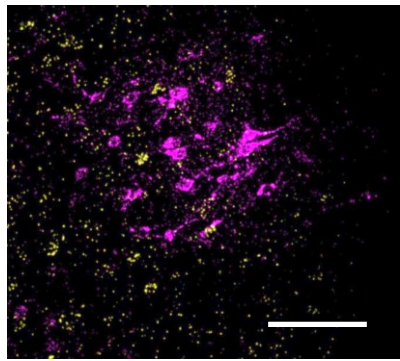

mRNAs+ Barcodes

Sequence barcodes  
Sequence genes

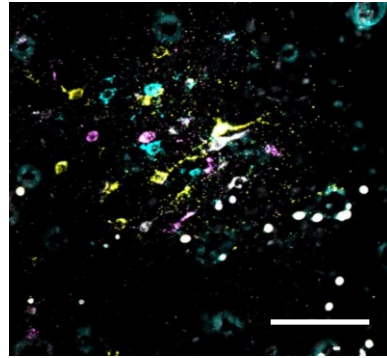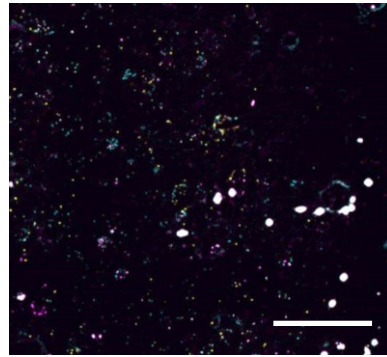

B

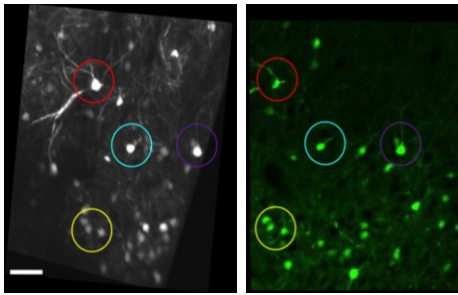

*in vivo*

*ex vivo*

# Supp Table S1

| OB | c1   | c2   | c3  | min qual<br>(>0.75) | CTB+ | Barseq+ | CTB+<br>Barseq+ | CTB+<br>Barseq- | CTB-<br>Barseq+ | CTB-<br>Barseq- |
|----|------|------|-----|---------------------|------|---------|-----------------|-----------------|-----------------|-----------------|
| 0  | 151  | 186  | 4   | 0.95                | 0    | 1       | 0               | 0               | 1               | 0               |
| 0  | 1433 | 995  | 87  | 0.96                | 0    | 1       | 0               | 0               | 1               | 0               |
| 0  | 155  | 70   | 11  | 0.91                | 0    | 1       | 0               | 0               | 1               | 0               |
| 0  | 177  | 197  | 17  | 0.89                | 0    | 1       | 0               | 0               | 1               | 0               |
| 0  | 17   | 102  | 1   | 0.92                | 1    | 1       | 1               | 0               | 0               | 0               |
| 0  | 132  | 135  | 10  | 0.88                | 0    | 1       | 0               | 0               | 1               | 0               |
| 0  | 96   | 157  | 12  | 0.88                | 0    | 1       | 0               | 0               | 1               | 0               |
| 0  | 102  | 58   | 6   | 0.90                | 0    | 1       | 0               | 0               | 1               | 0               |
| 0  | 665  | 58   | 14  | 0.82                | 0    | 1       | 0               | 0               | 1               | 0               |
| 0  | 14   | 100  | 5   | 0.87                | 1    | 1       | 1               | 0               | 0               | 0               |
| 0  | 0    | 0    | 0   | 0.91                | 0    | 0       | 0               | 0               | 0               | 1               |
| 0  | 0    | 0    | 0   | 0.97                | 0    | 0       | 0               | 0               | 0               | 1               |
| 0  | 126  | 112  | 7   | 0.84                | 1    | 1       | 1               | 0               | 0               | 0               |
| 3  | 281  | 359  | 28  | 0.88                | 0    | 1       | 0               | 0               | 1               | 0               |
| 0  | 419  | 313  | 34  | 0.94                | 1    | 1       | 1               | 0               | 0               | 0               |
| 0  | 106  | 139  | 3   | 0.79                | 0    | 1       | 0               | 0               | 1               | 0               |
| 0  | 72   | 89   | 15  | 0.88                | 1    | 1       | 1               | 0               | 0               | 0               |
| 0  | 342  | 159  | 4   | 0.88                | 0    | 1       | 0               | 0               | 1               | 0               |
| 2  | 1571 | 1061 | 100 | 0.92                | 0    | 1       | 0               | 0               | 1               | 0               |
| 0  | 0    | 0    | 0   | 0.79                | 0    | 0       | 0               | 0               | 0               | 1               |
| 0  | 0    | 0    | 0   | 0.86                | 0    | 0       | 0               | 0               | 0               | 1               |
| 0  | 0    | 0    | 0   | 0.83                | 0    | 0       | 0               | 0               | 0               | 1               |
| 0  | 232  | 51   | 5   | 0.89                | 0    | 1       | 0               | 0               | 1               | 0               |
| 0  | 0    | 0    | 0   | 0.92                | 0    | 0       | 0               | 0               | 0               | 1               |
| 0  | 372  | 344  | 19  | 0.87                | 1    | 1       | 1               | 0               | 0               | 0               |
| 0  | 0    | 0    | 0   | 0.88                | 0    | 0       | 0               | 0               | 0               | 1               |
| 0  | 44   | 20   | 1   | 0.83                | 0    | 1       | 0               | 0               | 1               | 0               |
| 0  | 234  | 209  | 20  | 0.95                | 1    | 1       | 1               | 0               | 0               | 0               |
| 0  | 109  | 10   | 6   | 0.90                | 0    | 1       | 0               | 0               | 1               | 0               |
| 3  | 281  | 359  | 28  | 0.91                | 0    | 1       | 0               | 0               | 1               | 0               |
| 0  | 61   | 66   | 4   | 0.95                | 0    | 1       | 0               | 0               | 1               | 0               |
| 0  | 0    | 0    | 0   | 0.82                | 0    | 0       | 0               | 0               | 0               | 1               |
| 0  | 0    | 0    | 0   | 0.95                | 0    | 0       | 0               | 0               | 0               | 1               |
| 0  | 335  | 79   | 15  | 0.92                | 0    | 1       | 0               | 0               | 1               | 0               |
| 0  | 114  | 186  | 9   | 0.94                | 0    | 1       | 0               | 0               | 1               | 0               |
| 0  | 0    | 0    | 0   | 0.90                | 1    | 0       | 0               | 1               | 0               | 0               |
| 0  | 271  | 211  | 21  | 0.91                | 0    | 1       | 0               | 0               | 1               | 0               |
| 0  | 3159 | 415  | 28  | 0.78                | 1    | 1       | 1               | 0               | 0               | 0               |
| 0  | 0    | 0    | 0   | 0.79                | 0    | 0       | 0               | 0               | 0               | 1               |
| 0  | 305  | 148  | 18  | 0.94                | 0    | 1       | 0               | 0               | 1               | 0               |
| 0  | 0    | 0    | 0   | 0.94                | 0    | 0       | 0               | 0               | 0               | 1               |
| 0  | 637  | 293  | 31  | 0.85                | 1    | 1       | 1               | 0               | 0               | 0               |
| 0  | 471  | 413  | 15  | 0.93                | 0    | 1       | 0               | 0               | 1               | 0               |
| 0  | 1062 | 528  | 94  | 0.92                | 1    | 1       | 1               | 0               | 0               | 0               |
| 0  | 335  | 79   | 15  | 0.92                | 0    | 1       | 0               | 0               | 1               | 0               |
| 0  | 59   | 73   | 3   | 0.86                | 0    | 1       | 0               | 0               | 1               | 0               |
| 0  | 565  | 359  | 27  | 0.93                | 0    | 1       | 0               | 0               | 1               | 0               |
| 0  | 460  | 208  | 82  | 0.94                | 0    | 1       | 0               | 0               | 1               | 0               |
| 0  | 0    | 0    | 0   | 0.83                | 0    | 0       | 0               | 0               | 0               | 1               |
| 0  | 0    | 0    | 0   | 0.84                | 0    | 0       | 0               | 0               | 0               | 1               |
| 0  | 0    | 0    | 0   | 0.96                | 0    | 0       | 0               | 0               | 0               | 1               |
| 0  | 208  | 69   | 5   | 0.91                | 1    | 1       | 1               | 0               | 0               | 0               |
| 0  | 0    | 0    | 0   | 0.91                | 0    | 0       | 0               | 0               | 0               | 1               |
| 0  | 1148 | 481  | 30  | 0.97                | 0    | 1       | 0               | 0               | 1               | 0               |
| 0  | 200  | 102  | 14  | 0.80                | 1    | 1       | 1               | 0               | 0               | 0               |
| 0  | 238  | 154  | 25  | 0.94                | 0    | 1       | 0               | 0               | 1               | 0               |
| 3  | 609  | 575  | 62  | 0.88                | 0    | 1       | 0               | 0               | 1               | 0               |
| 0  | 18   | 5    | 0   | 0.79                | 0    | 1       | 0               | 0               | 1               | 0               |
| 0  | 0    | 0    | 0   | 0.95                | 0    | 0       | 0               | 0               | 0               | 1               |
| 0  | 1748 | 163  | 31  | 0.92                | 0    | 1       | 0               | 0               | 1               | 0               |
| 0  | 0    | 0    | 0   | 0.96                | 0    | 0       | 0               | 0               | 0               | 1               |

## Supp Table S2

|                       |      |       |       |
|-----------------------|------|-------|-------|
| Brain ID              | XC9  | XC14* | XC28  |
| Proj barcode #        | 4841 | 8418  | 13581 |
| # of cells in ACx     | 1575 | 13998 | 1662  |
| # of cells projecting | 895  | 5082  | 911   |
| # of filtered cells   | 605  | 5082  | 704   |

# Supp Table S3

| Slice#            | 1           | 2           | 3           | Mean $\pm$ sem       |
|-------------------|-------------|-------------|-------------|----------------------|
| L2/3 – L5 (Cux2)  | 640 $\mu$ m | 590 $\mu$ m | 550 $\mu$ m | 600 $\pm$ 20 $\mu$ m |
| L2/3 – L5 (Fezf2) | 550 $\mu$ m | 600 $\mu$ m | 590 $\mu$ m | 580 $\pm$ 10 $\mu$ m |
| L5 – L6 (Fezf2)   | 800 $\mu$ m | 830 $\mu$ m | 870 $\mu$ m | 830 $\pm$ 20 $\mu$ m |
