# Supplementary material for: High-throughput mapping of long-range neuronal projection using in situ sequencing
Source: bioRxiv or medRxiv preprint supplement (doi:10.1101/294637), 2019-07-30
Supplement: Supplementary file [file media-1.pdf]

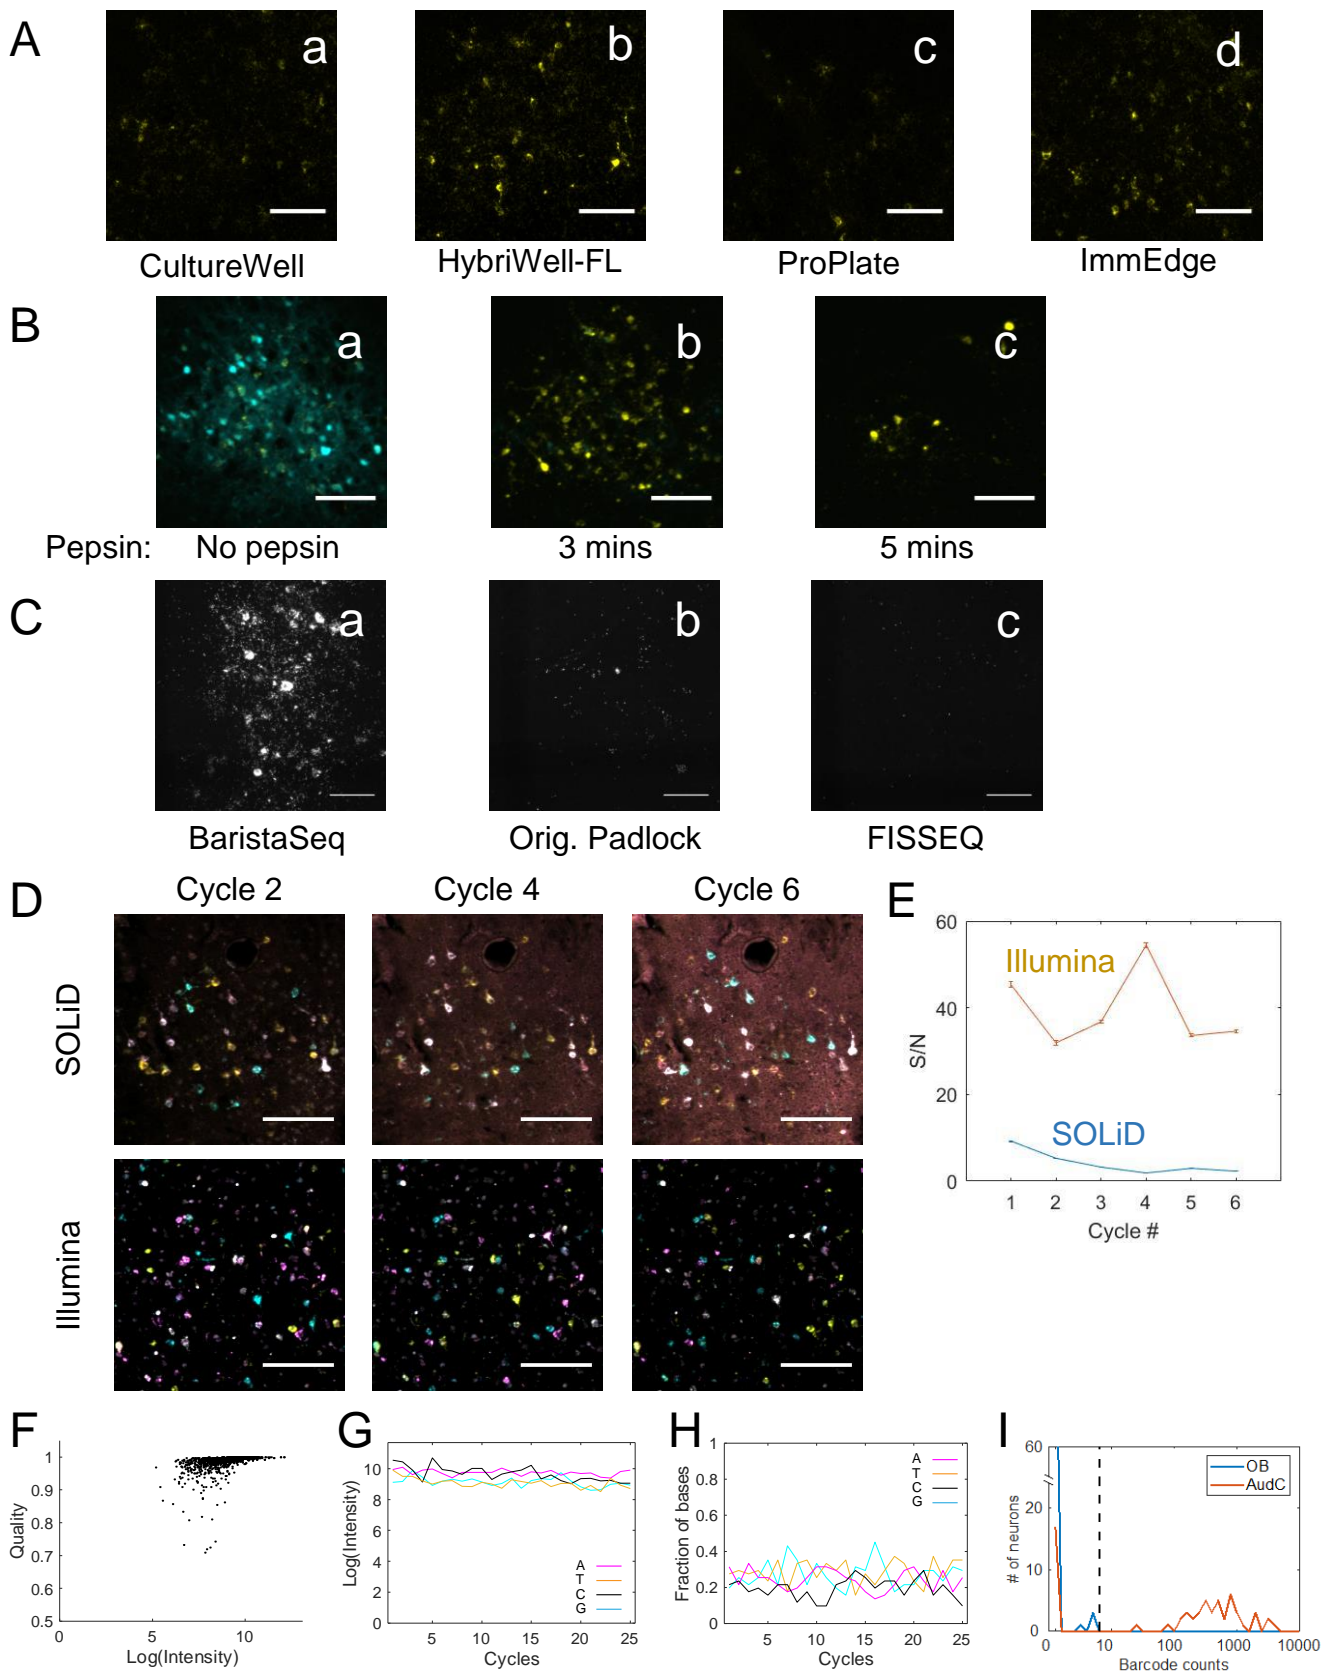

Fig. S1, related to Fig. 2 and STAR Methods



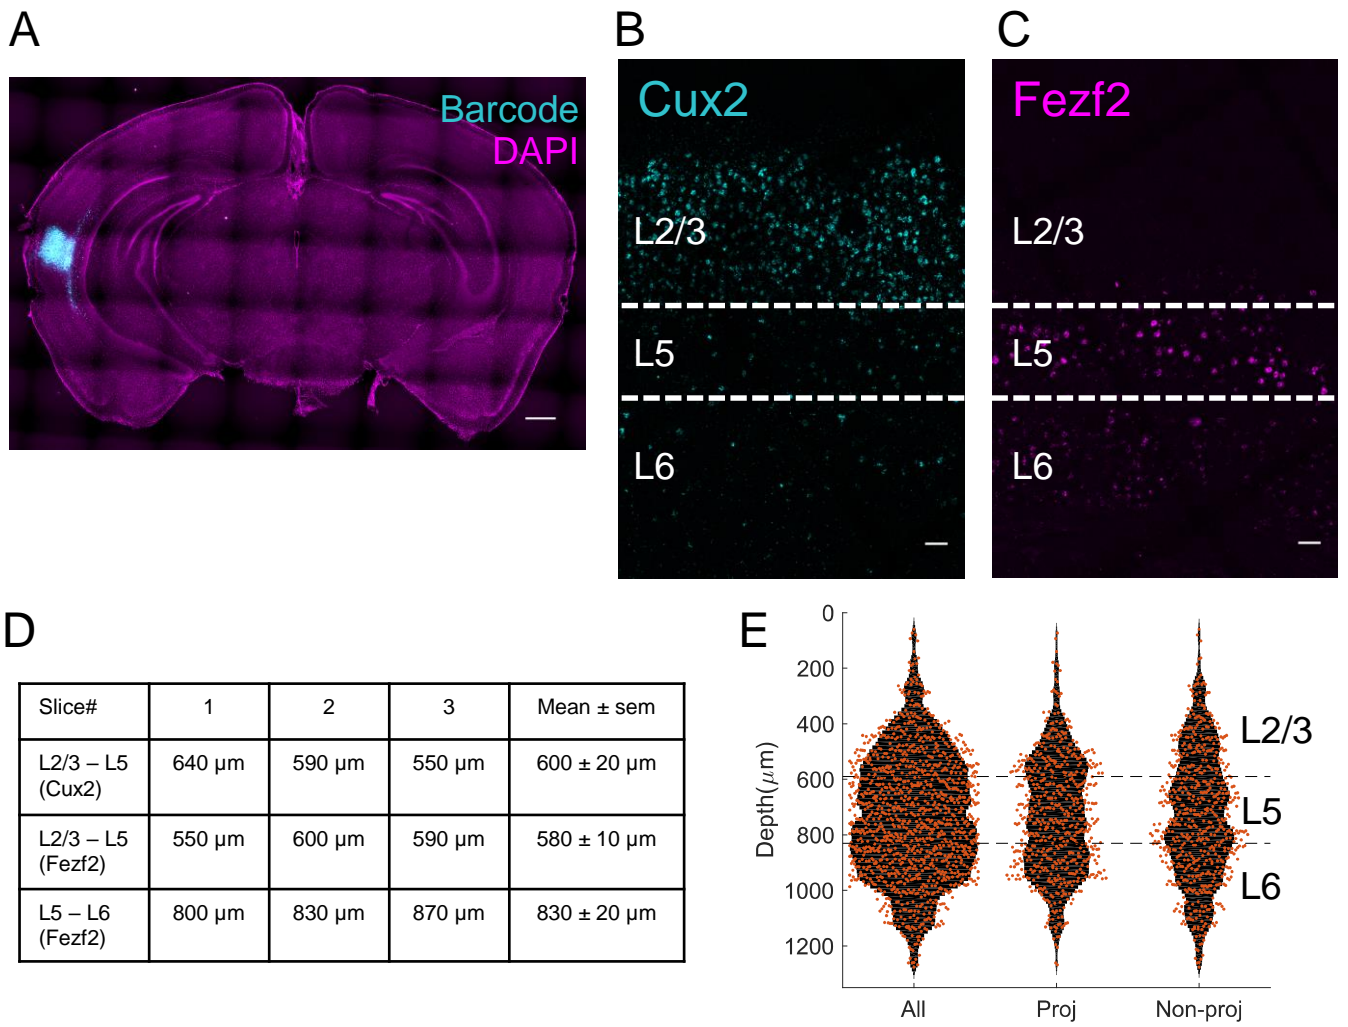

Fig. S3, related to STAR Methods and Fig. 4

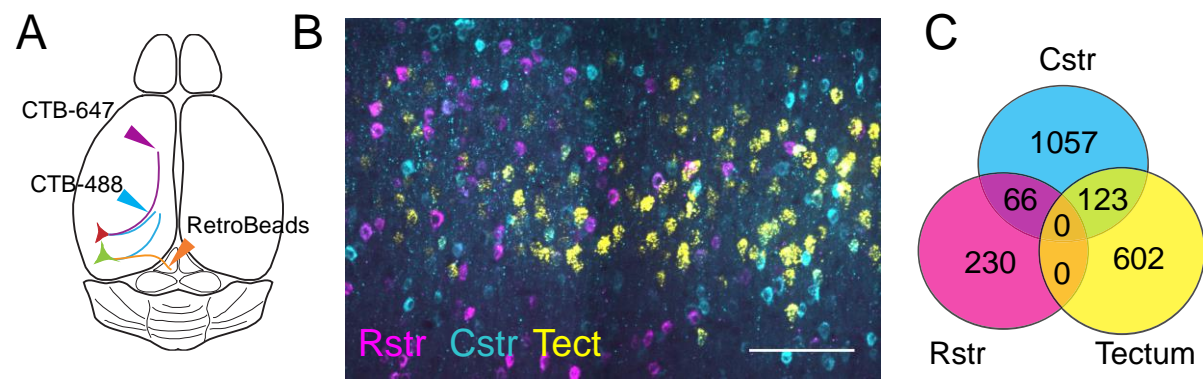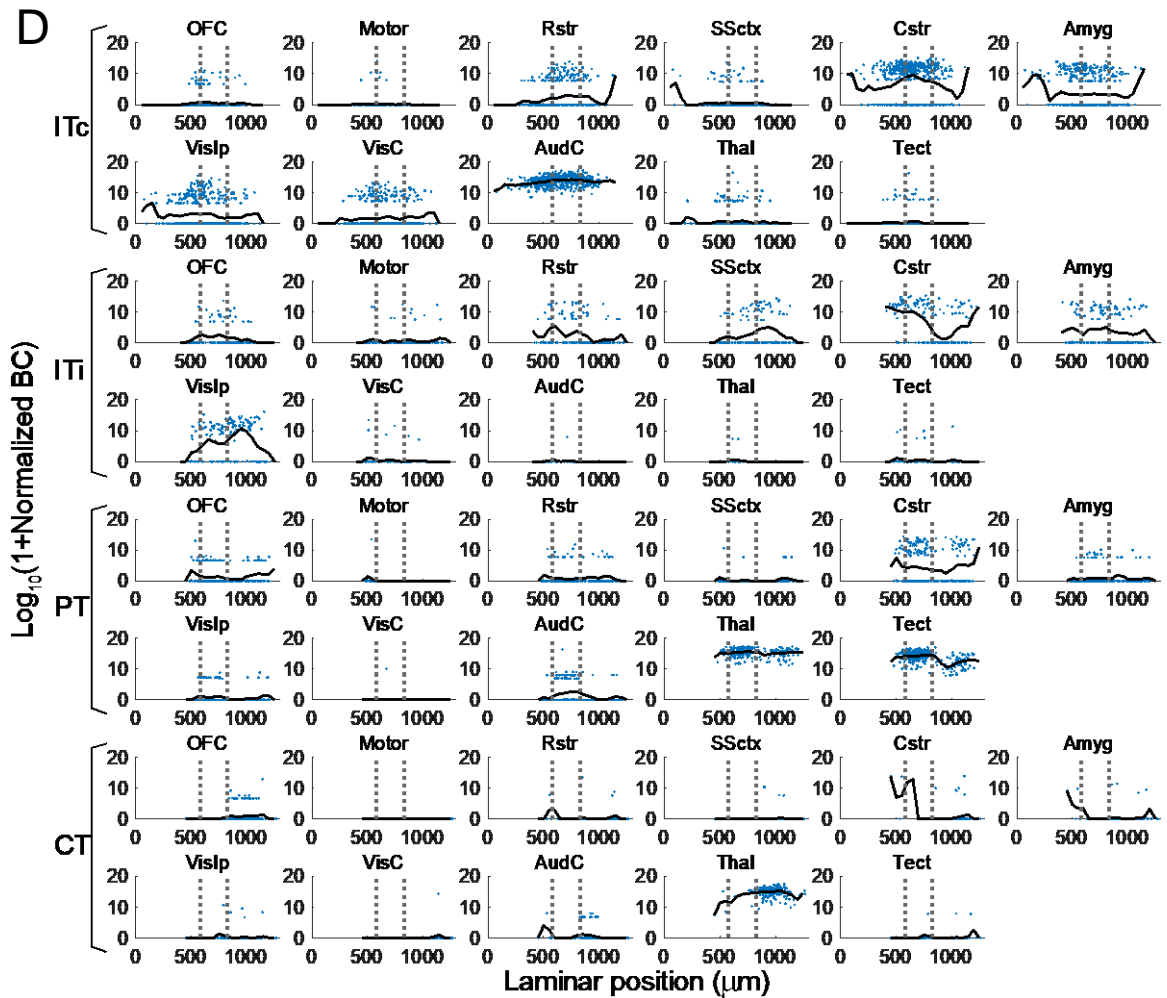

Fig. S4, related to Fig. 5

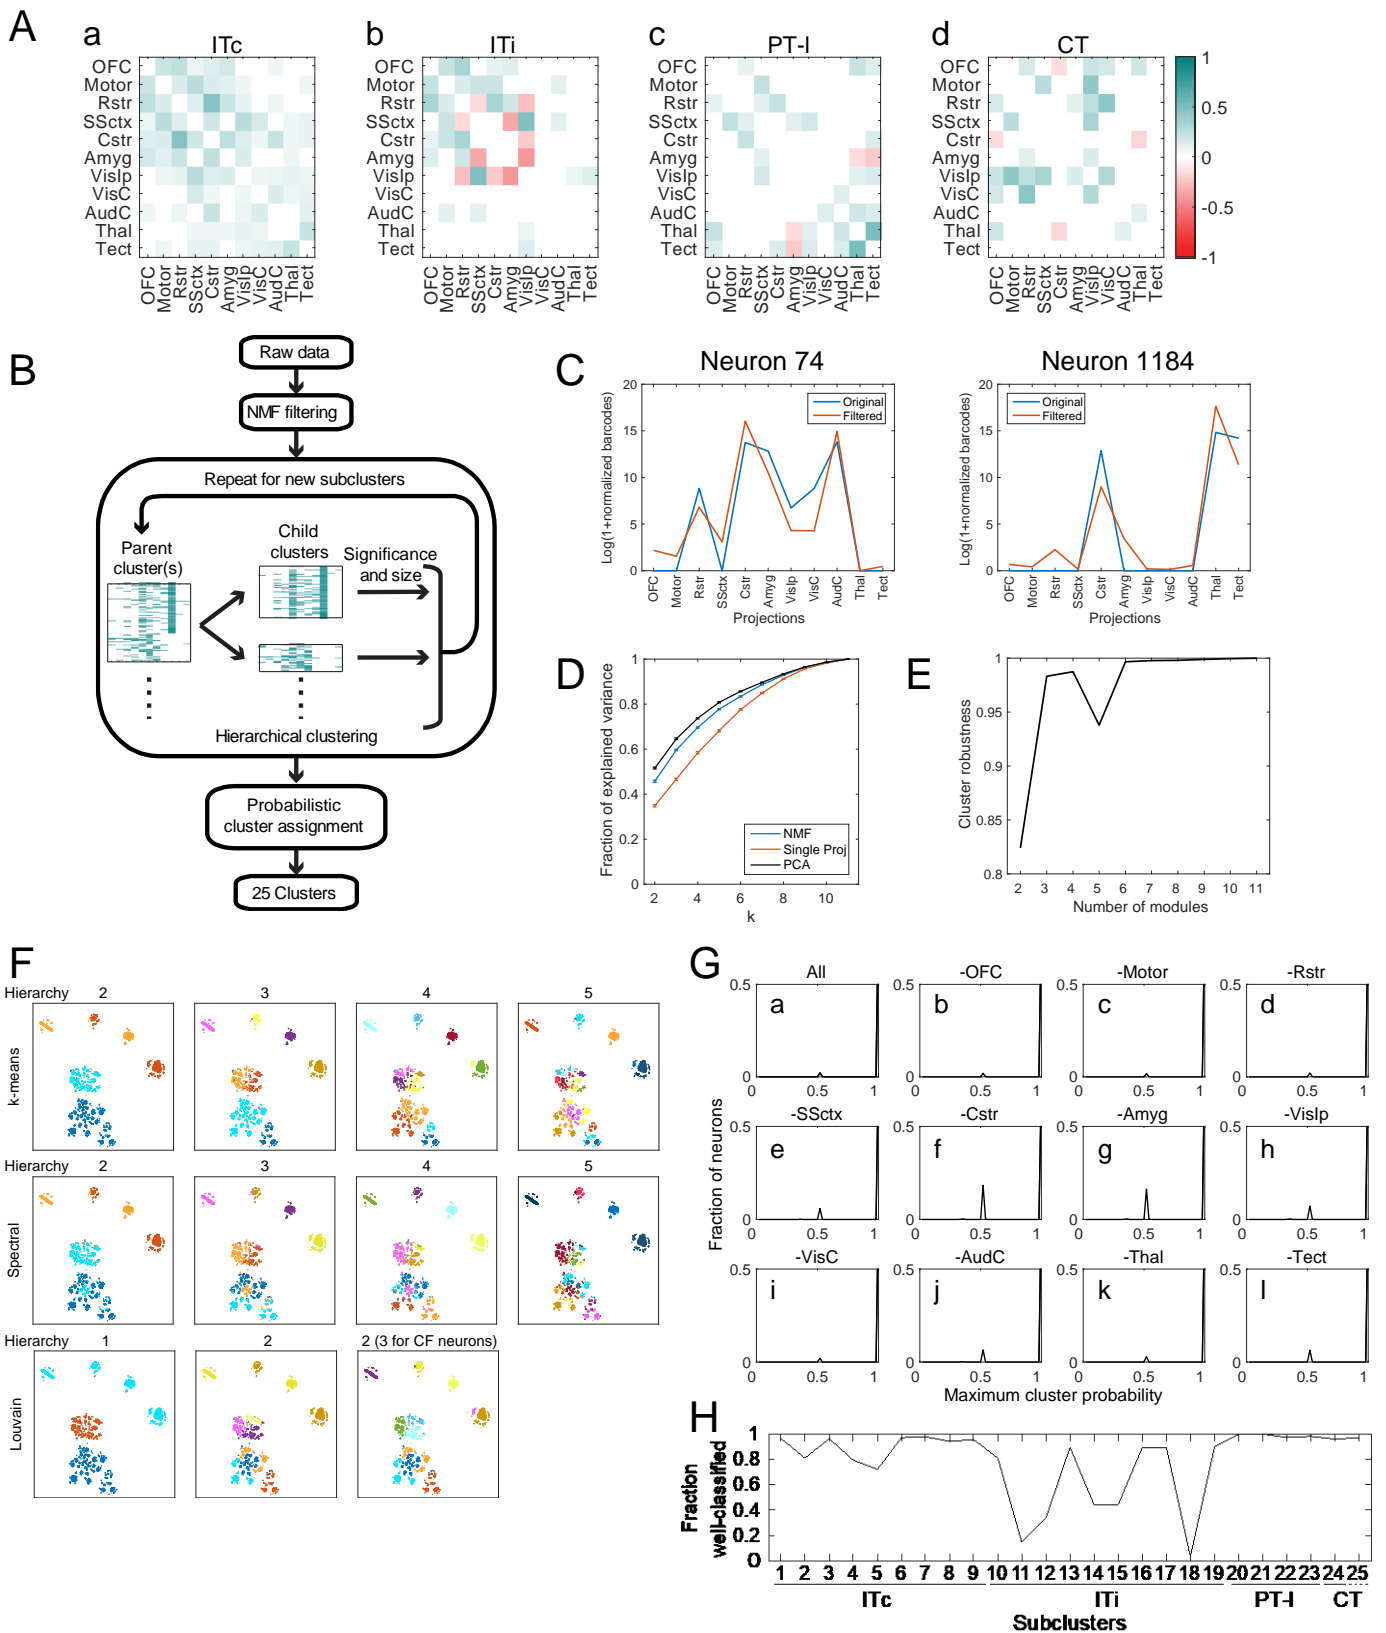

Fig. S5, related to Fig. 5 and STAR Methods

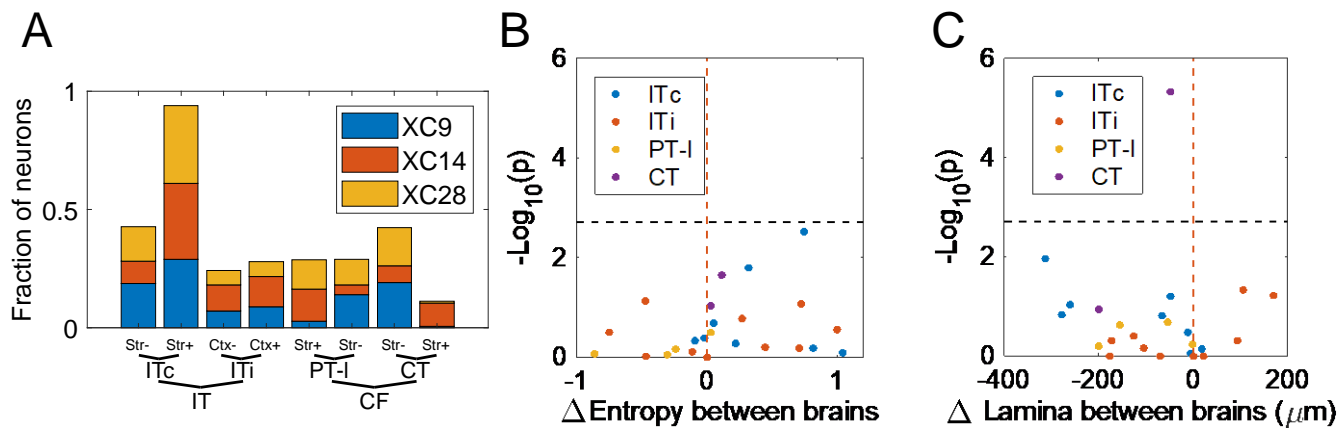

Fig. S6, related to Fig. 5

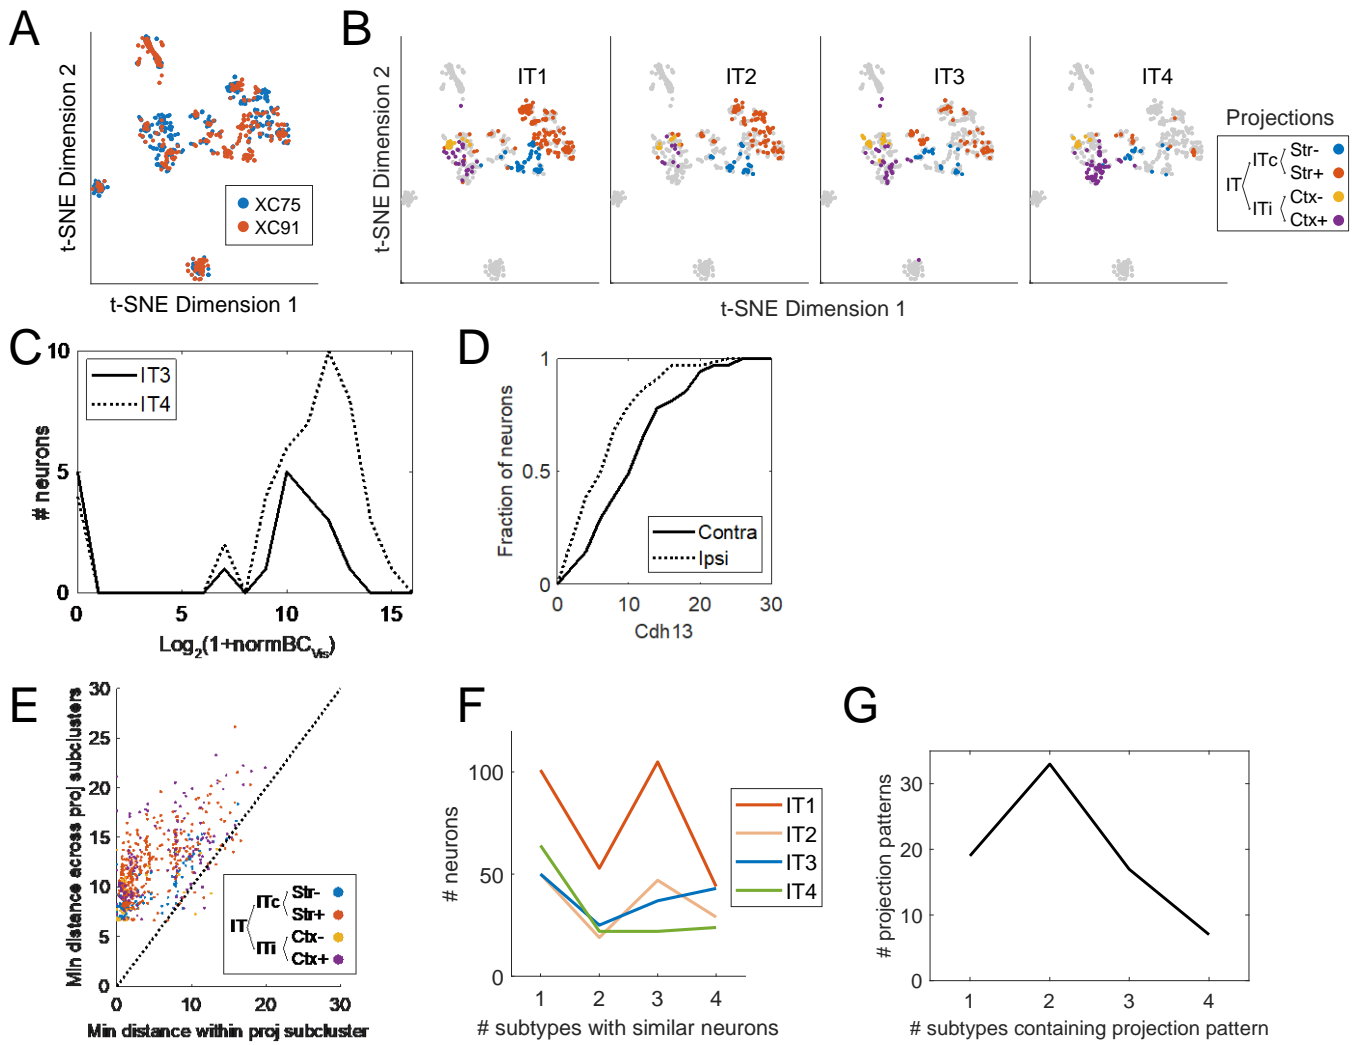

Fig. S7, related to Fig. 6 and Fig. 7

| OB | c1   | c2   | c3  | min qual (>0.75) | CTB+ | BARseq+ |
|----|------|------|-----|------------------|------|---------|
| 0  | 151  | 186  | 4   | 0.95             | 0    | 1       |
| 0  | 1433 | 995  | 87  | 0.96             | 0    | 1       |
| 0  | 155  | 70   | 11  | 0.91             | 0    | 1       |
| 0  | 177  | 197  | 17  | 0.89             | 0    | 1       |
| 0  | 17   | 102  | 1   | 0.92             | 1    | 1       |
| 0  | 132  | 135  | 10  | 0.88             | 0    | 1       |
| 0  | 96   | 157  | 12  | 0.88             | 0    | 1       |
| 0  | 102  | 58   | 6   | 0.90             | 0    | 1       |
| 0  | 665  | 58   | 14  | 0.82             | 0    | 1       |
| 0  | 14   | 100  | 5   | 0.87             | 1    | 1       |
| 0  | 0    | 0    | 0   | 0.91             | 0    | 0       |
| 0  | 0    | 0    | 0   | 0.97             | 0    | 0       |
| 0  | 126  | 112  | 7   | 0.84             | 1    | 1       |
| 3  | 281  | 359  | 28  | 0.88             | 0    | 1       |
| 0  | 419  | 313  | 34  | 0.94             | 1    | 1       |
| 0  | 106  | 139  | 3   | 0.79             | 0    | 1       |
| 0  | 72   | 89   | 15  | 0.88             | 1    | 1       |
| 0  | 342  | 159  | 4   | 0.88             | 0    | 1       |
| 2  | 1571 | 1061 | 100 | 0.92             | 0    | 1       |
| 0  | 0    | 0    | 0   | 0.79             | 0    | 0       |
| 0  | 0    | 0    | 0   | 0.86             | 0    | 0       |
| 0  | 0    | 0    | 0   | 0.83             | 0    | 0       |
| 0  | 232  | 51   | 5   | 0.89             | 0    | 1       |
| 0  | 0    | 0    | 0   | 0.92             | 0    | 0       |
| 0  | 372  | 344  | 19  | 0.87             | 1    | 1       |
| 0  | 0    | 0    | 0   | 0.88             | 0    | 0       |
| 0  | 44   | 20   | 1   | 0.83             | 0    | 1       |
| 0  | 234  | 209  | 20  | 0.95             | 1    | 1       |
| 0  | 109  | 10   | 6   | 0.90             | 0    | 1       |
| 3  | 281  | 359  | 28  | 0.91             | 0    | 1       |
| 0  | 61   | 66   | 4   | 0.95             | 0    | 1       |
| 0  | 0    | 0    | 0   | 0.82             | 0    | 0       |
| 0  | 0    | 0    | 0   | 0.95             | 0    | 0       |
| 0  | 335  | 79   | 15  | 0.92             | 0    | 1       |
| 0  | 114  | 186  | 9   | 0.94             | 0    | 1       |
| 0  | 0    | 0    | 0   | 0.90             | 1    | 0       |
| 0  | 271  | 211  | 21  | 0.91             | 0    | 1       |
| 0  | 3159 | 415  | 28  | 0.78             | 1    | 1       |
| 0  | 0    | 0    | 0   | 0.79             | 0    | 0       |
| 0  | 305  | 148  | 18  | 0.94             | 0    | 1       |
| 0  | 0    | 0    | 0   | 0.94             | 0    | 0       |
| 0  | 637  | 293  | 31  | 0.85             | 1    | 1       |
| 0  | 471  | 413  | 15  | 0.93             | 0    | 1       |
| 0  | 1062 | 528  | 94  | 0.92             | 1    | 1       |
| 0  | 335  | 79   | 15  | 0.92             | 0    | 1       |
| 0  | 59   | 73   | 3   | 0.86             | 0    | 1       |
| 0  | 565  | 359  | 27  | 0.93             | 0    | 1       |
| 0  | 460  | 208  | 82  | 0.94             | 0    | 1       |
| 0  | 0    | 0    | 0   | 0.83             | 0    | 0       |
| 0  | 0    | 0    | 0   | 0.84             | 0    | 0       |
| 0  | 0    | 0    | 0   | 0.96             | 0    | 0       |
| 0  | 208  | 69   | 5   | 0.91             | 1    | 1       |
| 0  | 0    | 0    | 0   | 0.91             | 0    | 0       |
| 0  | 1148 | 481  | 30  | 0.97             | 0    | 1       |
| 0  | 200  | 102  | 14  | 0.80             | 1    | 1       |
| 0  | 238  | 154  | 25  | 0.94             | 0    | 1       |
| 3  | 609  | 575  | 62  | 0.88             | 0    | 1       |
| 0  | 18   | 5    | 0   | 0.79             | 0    | 1       |
| 0  | 0    | 0    | 0   | 0.95             | 0    | 0       |
| 0  | 1748 | 163  | 31  | 0.92             | 0    | 1       |
| 0  | 0    | 0    | 0   | 0.96             | 0    | 0       |

Table S1, related to Fig. 2



| Cell Index | OB | Ipsi-Ctx | Contra-Ctx | Str | Thal | Tect | Total | Slc17a7 | Gad2 |
|------------|----|----------|------------|-----|------|------|-------|---------|------|
| 1012       | 0  | 14       | 87         | 0   | 0    | 0    | 101   | 1       | 0    |
| 1024       | 0  | 119      | 0          | 0   | 0    | 0    | 119   | 1       | 0    |
| 1029       | 0  | 0        | 0          | 0   | 0    | 0    | 0     | 1       | 0    |
| 1074       | 0  | 21       | 18         | 25  | 0    | 0    | 64    | 1       | 0    |
| 1075       | 0  | 0        | 0          | 0   | 0    | 0    | 0     | 0       | 0    |
| 1128       | 0  | 30       | 44         | 10  | 0    | 0    | 84    | 1       | 0    |
| 1135       | 0  | 28       | 3          | 0   | 0    | 0    | 31    | 1       | 0    |
| 1155       | 0  | 0        | 0          | 0   | 0    | 0    | 0     | 0       | 1    |
| 1167       | 0  | 0        | 0          | 0   | 0    | 0    | 0     | 1       | 0    |
| 1179       | 0  | 0        | 170        | 1   | 0    | 0    | 171   | 1       | 0    |
| 1192       | 0  | 0        | 0          | 0   | 0    | 0    | 0     | 0       | 0    |
| 1199       | 0  | 0        | 0          | 0   | 0    | 0    | 0     | 0       | 0    |
| 1226       | 0  | 0        | 0          | 0   | 0    | 0    | 0     | 0       | 0    |
| 1245       | 0  | 0        | 0          | 0   | 0    | 0    | 0     | 1       | 0    |
| 1267       | 0  | 0        | 0          | 0   | 0    | 0    | 0     | 0       | 0    |
| 1274       | 0  | 0        | 16         | 0   | 0    | 0    | 16    | 1       | 0    |
| 2007       | 0  | 4        | 0          | 0   | 0    | 0    | 4     | 1       | 0    |
| 2051       | 0  | 0        | 0          | 0   | 0    | 0    | 0     | 0       | 0    |
| 2054       | 0  | 0        | 0          | 0   | 0    | 1    | 1     | 1       | 0    |
| 3009       | 0  | 0        | 0          | 0   | 0    | 0    | 0     | 0       | 0    |
| 3012       | 0  | 41       | 0          | 0   | 0    | 0    | 41    | 1       | 0    |
| 3076       | 0  | 68       | 48         | 0   | 0    | 0    | 116   | 1       | 0    |
| 3082       | 0  | 9        | 182        | 0   | 0    | 0    | 191   | 1       | 0    |
| 3090       | 0  | 0        | 1          | 0   | 0    | 0    | 1     | 1       | 0    |
| 3130       | 0  | 0        | 74         | 0   | 0    | 0    | 74    | 1       | 0    |
| 4003       | 0  | 34       | 0          | 0   | 0    | 0    | 34    | 1       | 0    |
| 4005       | 0  | 0        | 0          | 0   | 0    | 0    | 0     | 1       | 0    |
| 4008       | 0  | 0        | 0          | 0   | 0    | 0    | 0     | 0       | 0    |
| 4010       | 0  | 253      | 10         | 5   | 0    | 0    | 268   | 1       | 0    |
| 4018       | 0  | 0        | 0          | 0   | 0    | 0    | 0     | 0       | 1    |
| 4022       | 0  | 51       | 51         | 16  | 0    | 0    | 118   | 1       | 0    |
| 4062       | 0  | 0        | 12         | 0   | 0    | 0    | 12    | 1       | 0    |
| 4066       | 0  | 0        | 64         | 1   | 1    | 0    | 66    | 1       | 0    |
| 4067       | 0  | 0        | 0          | 0   | 151  | 0    | 151   | 1       | 0    |
| 4068       | 0  | 11       | 24         | 0   | 0    | 0    | 35    | 1       | 0    |
| 4082       | 0  | 39       | 0          | 0   | 0    | 0    | 39    | 1       | 0    |
| 4088       | 0  | 0        | 0          | 0   | 0    | 0    | 0     | 0       | 0    |
| 4101       | 0  | 10       | 0          | 0   | 0    | 0    | 10    | 1       | 0    |
| 4112       | 0  | 0        | 0          | 0   | 0    | 0    | 0     | 0       | 0    |
| 4114       | 0  | 80       | 57         | 0   | 0    | 0    | 137   | 1       | 0    |
| 4129       | 0  | 0        | 0          | 0   | 0    | 0    | 0     | 1       | 0    |
| 4150       | 0  | 0        | 0          | 0   | 0    | 0    | 0     | 1       | 0    |
| 4163       | 0  | 20       | 4          | 0   | 0    | 0    | 24    | 1       | 0    |
| 4164       | 0  | 0        | 0          | 0   | 0    | 0    | 0     | 1       | 0    |
| 4165       | 0  | 0        | 0          | 0   | 0    | 0    | 0     | 1       | 0    |
| 4169       | 0  | 0        | 0          | 0   | 0    | 0    | 0     | 0       | 0    |
| 4204       | 0  | 0        | 90         | 0   | 0    | 0    | 90    | 1       | 0    |
| 4217       | 0  | 0        | 0          | 0   | 0    | 0    | 0     | 1       | 0    |
| 4224       | 0  | 0        | 47         | 0   | 0    | 0    | 47    | 1       | 0    |
| 4232       | 0  | 2        | 6          | 22  | 0    | 0    | 30    | 1       | 0    |

| Cell Index | OB | Ipsi-Ctx | Contra-Ctx | Str | Thal | Tect | Total | Slc17a7 | Gad2 |
|------------|----|----------|------------|-----|------|------|-------|---------|------|
| 4238       | 0  | 0        | 0          | 0   | 0    | 0    | 0     | 0       | 0    |
| 4241       | 0  | 0        | 105        | 0   | 0    | 0    | 105   | 1       | 0    |
| 4264       | 0  | 14       | 149        | 18  | 0    | 0    | 181   | 1       | 0    |
| 4269       | 0  | 0        | 5          | 0   | 0    | 0    | 5     | 1       | 0    |
| 5001       | 0  | 8        | 106        | 1   | 0    | 0    | 115   | 1       | 0    |
| 5035       | 0  | 4        | 114        | 0   | 0    | 0    | 118   | 1       | 0    |
| 5038       | 0  | 0        | 0          | 0   | 0    | 0    | 0     | 1       | 0    |
| 5076       | 0  | 0        | 80         | 0   | 0    | 0    | 80    | 1       | 0    |
| 5092       | 0  | 0        | 63         | 2   | 0    | 0    | 65    | 1       | 0    |
| 5096       | 0  | 0        | 0          | 0   | 0    | 0    | 0     | 1       | 0    |
| 5111       | 0  | 0        | 0          | 0   | 0    | 0    | 0     | 0       | 0    |
| 5112       | 0  | 0        | 0          | 0   | 0    | 0    | 0     | 0       | 0    |
| 5114       | 0  | 0        | 13         | 0   | 0    | 0    | 13    | 1       | 0    |
| 5144       | 0  | 0        | 3          | 0   | 0    | 0    | 3     | 1       | 0    |
| 5165       | 0  | 7        | 34         | 0   | 0    | 0    | 41    | 1       | 0    |
| 5166       | 0  | 0        | 0          | 0   | 0    | 0    | 0     | 1       | 0    |
| 5178       | 0  | 0        | 0          | 0   | 0    | 0    | 0     | 0       | 1    |
| 6003       | 0  | 0        | 0          | 0   | 0    | 0    | 0     | 1       | 0    |
| 6005       | 0  | 2        | 37         | 1   | 0    | 0    | 40    | 1       | 0    |
| 6030       | 0  | 0        | 22         | 19  | 0    | 0    | 41    | 1       | 0    |
| 6044       | 0  | 42       | 77         | 14  | 1    | 0    | 134   | 1       | 0    |
| 6051       | 0  | 0        | 0          | 0   | 0    | 0    | 0     | 1       | 0    |
| 6077       | 0  | 0        | 0          | 0   | 0    | 0    | 0     | 1       | 0    |
| 6143       | 0  | 0        | 68         | 0   | 0    | 0    | 68    | 1       | 0    |
| 6149       | 0  | 0        | 0          | 0   | 0    | 0    | 0     | 1       | 0    |
| 7006       | 0  | 0        | 0          | 0   | 0    | 0    | 0     | 0       | 0    |
| 7047       | 0  | 0        | 0          | 0   | 0    | 0    | 0     | 1       | 0    |
| 7049       | 0  | 0        | 0          | 0   | 1    | 0    | 1     | 1       | 0    |
| 7063       | 0  | 0        | 0          | 0   | 0    | 0    | 0     | 1       | 0    |
| 7070       | 0  | 0        | 4          | 0   | 0    | 0    | 4     | 1       | 0    |
| 7076       | 0  | 0        | 0          | 0   | 0    | 0    | 0     | 1       | 0    |
| 7083       | 0  | 0        | 0          | 0   | 0    | 0    | 0     | 1       | 0    |
| 7126       | 0  | 0        | 0          | 0   | 0    | 0    | 0     | 1       | 0    |
| 7136       | 0  | 0        | 1          | 0   | 0    | 0    | 1     | 1       | 0    |
| 7140       | 0  | 0        | 24         | 4   | 0    | 0    | 28    | 1       | 0    |
| 8025       | 0  | 36       | 19         | 4   | 0    | 0    | 59    | 1       | 0    |
| 9013       | 0  | 0        | 0          | 0   | 0    | 0    | 0     | 1       | 0    |
| 9024       | 0  | 0        | 0          | 0   | 0    | 0    | 0     | 1       | 0    |
| 9057       | 0  | 116      | 0          | 1   | 2    | 0    | 119   | 1       | 0    |
| 9058       | 0  | 14       | 21         | 0   | 0    | 0    | 35    | 1       | 0    |
| 9063       | 0  | 0        | 0          | 0   | 0    | 0    | 0     | 1       | 0    |
| 9067       | 0  | 12       | 9          | 15  | 0    | 0    | 36    | 1       | 0    |
| 9073       | 0  | 8        | 0          | 0   | 0    | 0    | 8     | 1       | 0    |
| 9078       | 0  | 106      | 0          | 0   | 0    | 0    | 106   | 1       | 0    |
| 9083       | 0  | 0        | 0          | 0   | 0    | 0    | 0     | 0       | 0    |
| 9085       | 0  | 0        | 0          | 0   | 0    | 0    | 0     | 1       | 0    |
| 11012      | 0  | 20       | 10         | 0   | 0    | 0    | 30    | 1       | 0    |
| 11025      | 0  | 0        | 0          | 0   | 0    | 0    | 0     | 1       | 0    |
| 11032      | 0  | 6        | 117        | 0   | 2    | 6    | 131   | 1       | 0    |

Table S2, related to Fig. 3

|                       | BARseq |       | MAPseq* | BARseq + FISH** |      | BARseq + Cre*** |
|-----------------------|--------|-------|---------|-----------------|------|-----------------|
|                       | XC9    | XC28  | XC14    | XC75            | XC91 | XC92            |
| Brain ID              | XC9    | XC28  | XC14    | XC75            | XC91 | XC92            |
| # targets collected   | 12     | 12    | 12      | 18              | 18   | 12              |
| # slices sequenced    | 24     | 39    | N/A     | 24              | 32   | 10              |
| # of proj barcodes    | 4841   | 13581 | 8418    | 16042           | 8388 | 4772            |
| # of cells in ACx     | 1575   | 1662  | 13998   | 781             | 737  | 2817            |
| # of cells projecting | 895    | 911   | 5082    | 557             | 422  | 1291            |
| # of filtered cells   | 605    | 704   | 5082    | 557             | 422  | 72 (Fezf2+)     |

Table S3, related to Fig. 4
